# Supplementary material for: New Approaches to Seismic Microzonation Modelling of Ground Shaking Using Direct Characteristics of Influencing Criteria: Case Study of Bam City, Iran
Source: Copernicus journal article supplement (doi:10.5194/nhess-2017-421), 2018-03-06
Supplement: Supplementary file [file nhess-2017-421-RC2-supplement.pdf]

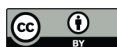

1 **New Approaches to Seismic Microzonation Modelling of Ground Shaking Using Direct**  
2 **Characteristics of Influencing Criteria: Case Study of Bam City, Iran**

3  
4 Reza Hassanzadeh<sup>1</sup>, Mehdi Honarmand<sup>2</sup>, Mahdiah Hossienjani Zadeh<sup>3</sup>, Farzin Naseri<sup>4</sup>

5  
6 Department of Ecology, Institute of Science and High Technology and Environmental  
7 Sciences, Graduate University of Advanced Technology, Kerman, 7631133131, Iran.

8 1. *r.hassanzadeh@kgut.ac.ir*, 2. *mehonarmand167@yahoo.com*, 3. *mh.hosseinjani@gmail.com*,  
9 4. *fjnaseri@yahoo.com*

10  
11 Correspondence to: Reza Hassanzadeh (*r.hassanzadeh@kgut.ac.ir*).

12  
13 **Abstract** 

14 This paper proposes a new model in evaluating seismic microzonation of ground shaking by considering  
15 direct characteristics of influencing criteria and dealing with uncertainty of modelling through production  
16 of fuzzy membership functions for each criterion. The relevant criteria were explored by reviewing  
17 previous literature and interviewing 10 specialized experts. Analytic Hierarchy Process (AHP) and Fuzzy  
18 Logic (FL) methods were applied in order to define priority rank of each criteria and to fuzzify sub-criteria  
19 of each criterion by interviewing 10 experts, respectively. Applying Fuzzy Logic method to deal with  
20 uncertainties of sub criteria of each criterion and using direct characteristics of each criterion are the new  
21 approaches in designing a new model. The criteria and sub-criteria were combined in GIS to develop a  
22 model for assessing microzonation of ground shaking in the study area of Bam city, Iran. The model's  
23 output shows high to very high ground shaking levels ~~were happened in central, east, and northeast to~~  
24 ~~north part of the area.~~ The validation results based on overall accuracy and Kappa statistics showed 80%  
25 to 82% accuracy, 0.74 and 0.75 Kappa indicating a good fit to the model's output. This model assists  
26 planners and decision makers to produce seismic microzonation of ground shaking to be incorporated in  
27 designing new development plans of urban and rural areas, and to facilitate making informed decision  
28 regarding safety measures of existing buildings and infrastructures.

29 **Keywords:** *Seismic Microzonation, Site Effects, Ground Shaking, Spatial Modelling, Analytic Hierarchy*  
30 *Process, Fuzzy Logic and GIS.*



## 34 1. Introduction

35 This paper explores direct characteristics of influencing criteria and dealing with uncertainty of  
36 modelling through production of fuzzy membership functions for each criterion for the assessment  
37 of ground shaking amplification in a study area. MERM microzonation manual (2003) sets  
38 different factors effecting on the amplitude and duration of ground shaking at a specific site.  
39 These include “the magnitude of the earthquake, focal point and depth of the earthquake,  
40 directivity of the energy release, distance of rapture from the site, geological condition from the  
41 site to the location of the earthquake, and local geology and topographical condition of the site”  
42 (SM Working Group, 2015;Boore, 2003;Hassanzadeh et al., 2013). It has long been known that  
43 local conditions of foundation soils have a significant impact on the effects of an earthquake, as  
44 it was demonstrated in previous earthquakes such as Mexico City, 1985 (Beck and Hall, 1986),  
45 Kobe, 1995 (Wald, 1996), Izmit, 1999 (Tang, 2000) and Umbria-Marche earthquake, 1997 (Moro  
46 et al., 2007). It was witnessed in the Bam earthquake, 2003 that buildings located on  
47 unconsolidated sediments had greater destruction levels (Ramazi and Jigheh, 2006). The aim of  
48 seismic microzonation studies is to prepare ground-shaking map that can communicate efficient  
49 data to planners and policy makers in a geographic area for making informed decision regarding  
50 development policies in urban areas. Therefore, this community require accurate and certain  
51 information for developing mitigation plans and strategies. In the spite of this, there are  
52 uncertainties in estimating seismic microzonation of ground shaking at a site, as this can be  
53 influenced by complex factors such as the estimates of earthquake source, wave propagation, and  
54 site condition. Uncertainty in these criteria results in uncertain ground-motion estimate from  
55 earthquakes (Wang et al., 2017;Wang et al., 2016;Petersen et al., 2016).

56 Probabilistic Seismic Hazard Analysis (PSHA) (Cornell, 1968) has been used to assess ground-  
57 motion hazards from earthquakes (Atkinson et al., 2015;Petersen et al., 2016). This method  
58 dependent on “the length of the causative faults and depth of the earthquake”, which are generally  
59 unknown that cause uncertainty in assessing ground-motion of earthquakes (Wang et al., 2017).  
60 In deterministic seismic hazard analysis (DSHA) (Campbell, 2003;Atkinson and Boore, 2006)  
61 absent of relevant ground-motion attenuation relationship for specific geographic areas can cause  
62 uncertainty in applying DSHA for assessing ground motions of an earthquake (Wang et al.,  
63 2017). Scenario-based seismic hazard analysis (SSHA) (Panza et al., 2012) applies ground-  
64 motion simulations of a scenario earthquake using specified source, path and site parameters. By



65 conducting many simulations, earthquake variability of different sources, ground-motion  
66 propagation characteristics, and local site effects can be considered. Therefore, uncertainties  
67 using SSHA are quantified explicitly (Wang et al., 2017).

68 Accurate measurement and communication of uncertainties are critical in ground-motion hazard  
69 assessment for earthquakes. Thus, ~~other~~ approach in microzonation studies is the use of multi-  
70 criteria decision-making methods (MCDM). According to these methods ~~after identifying~~  
71 ~~potential criteria~~, experts evaluate and choose among qualitative and quantitative criteria. Since,  
72 experts' judgments can be subjective and imprecise, uncertainty also exists in ~~the~~ analysis.  
73 Uncertainty stems mainly from sources such as the lack of the incomplete data availability,  
74 vagueness, and linguistic expert view. Such uncertainties and vagueness can be dealt with fuzzy  
75 logic principles (Zadeh, 1965) and inference systems (Klir, 2004; Zadeh, 1975). Based on fuzzy  
76 logic method, the content of each sentence implies logical rules, which constitute the foundation  
77 of fuzzy system modeling and inference procedures. In comprehensive decisions, an expert's  
78 heuristic knowledge or empirical information is used frequently for better conclusions. For these  
79 reasons, Fuzzy Logic is used for evaluating of seismic microzonation of ground shaking  
80 amplification.

81 There are many MCDM tools in the literature but Analytical Hierarchal Process (AHP) (Saaty,  
82 1980) is one of the most useful techniques, and plays an important role in calculating criteria's  
83 weights and selecting optimized alternatives. Sitharam and Anbazhagan (2008) applied AHP and  
84 GIS for seismic microzonation studies in Bangalore, India. Furthermore, AHP and GIS was  
85 applied to produce seismic microzonation map of Dehli (Mohanty et al., 2007), Haldia, Bengal  
86 Basin (India) (Mohanty and Walling, 2008), Erbaa (Turkey) (Akin et al., 2013) and Al-Madinah  
87 (Moustafa et al., 2016). Fuzzy Logic method was used for evaluation of earthquake damage to  
88 buildings (Sen, 2010), and quick seismic microzonation (Teramo et al., 2005; Nath and  
89 Thingbaijam, 2009; Boostan et al., 2015). Although there were a number of publications  
90 evaluating **the seismic microzonation of ground shaking amplification** in the literature, but there  
91 is lack of evidence in using the Fuzzy Logic method for producing **seismic microzonation of**  
92 **ground shaking amplification**. Moreover, few researchers have considered direct characteristics  
93 of each criteria in local ground shaking analysis. ~~Additionally~~, in order to remove uncertainties  
94 regarding source of probable earthquake, magnitude and ~~rapture~~ length, ~~therefore~~ these criteria  
95 was not considered for producing seismic microzonation of ground shaking in this study.



96 The main purpose of this paper is to develop a model for evaluation of seismic microzonation of  
97 ground shaking amplification using AHP, Fuzzy Logic and Weighted Linear Combination  
98 (WLC) methods in GIS. At this stage, model inputs are direct characteristics of local geology,  
99 hydrology, sedimentology, and topographical factors that should be taken into consideration.  
100 First all selected criteria were weighted using AHP method by interviewing 10 experts, then all  
101 criteria are converted into fuzzy sets and fuzzy membership functions (MFs) were produced, then  
102 WLC and fuzzy inference rules are used to develop a model for producing **seismic microzonation**  
103 **of ground shaking amplification** for a study area.

104

105

## 106 **2. Material and methods**

107 This study investigates the importance of influencing factors on **seismic microzonation of ground**  
108 **shaking**. These criteria ~~are identified by reviewing previous literature.~~ Analytic Hierarchy  
109 Process (AHP) and Fuzzy Logic (FL) Methods ~~are~~ applied to deal with selection, weighting and  
110 fuzziness of criteria due to associated uncertainties in the decision-making process of **seismic**  
111 **microzonation of ground shaking amplification** by interviewing experts. ~~Combining the criteria~~  
112 ~~and sub criteria is done based on WLC method.~~ Finally, the developed model is validated using  
113 Overall Accuracy (OA) and Kappa statistics methods. ~~The study has been conducted in four steps~~  
114 ~~that are elaborated in Figure 1.~~

115

116

117

118 Figure 1. The methodological approach of the model

119

120

### 121 **2.1. Identification, Weighting and Fuzzification of Criteria**

122 **Seismic microzonation of ground shaking** can be influenced by several criteria. These criteria  
123 need to be identified by reviewing literature and interviewing experts in data gathering step.  
124 Selected criteria will be weighted and fuzzified using AHP and FL methods **as they are explained**  
125 **in the following:**

126



127

## 128 **2.2.1. Analytical methods**

### 129 **2.2.1. Analytic Hierarchy Process (AHP) method**

130 Several methods have been developed to deal with ranking of criteria and solving a problem,  
131 such as Regime (Hinlopen et al., 1983), ELECTRE family (Figueira et al., 2005), Analytical  
132 Hierarchy Process (AHP) (Saaty, 1980), and Multiple Attribute Utility approach (MAUT)  
133 (Keeney and Raiffa, 1993). AHP is one of the most commonly used multi-criteria decision  
134 making (MCDM) tools, and allows the consideration of both objective and subjective factors in  
135 ranking alternatives in a hierarchical decision model (Saaty, 1980; Saaty, 1990). This method is  
136 applied to convert the experts' view on the importance of each criterion and sub-criterion to a  
137 numerical value by comparing ~~them to one another~~, one pair at a time (pair-wise comparison)  
138 (Saaty, 1980).

139

140 AHP matrix (A) is developed from the pair-wise comparison of the relative importance of  
141 criterion  $A_i$  to criterion  $A_j$  ( $\alpha_{ij}$ , represents a quantified judgment on a pair of criteria  $C_i, C_j$ ) (Figure  
142 2), as it was explained above. The values assigned to  $\alpha_{ij}$  according to the Saaty's scale (1980) ~~are~~  
143 ~~usually in the interval of 1~~ to 9 or their reciprocals. In order to calculate the priority ranking of  
144 each criterion (weight), Saaty (1990) suggested the mathematical computation of eigenvector  
145 (Eq. 1 & 2).

146

147

148 Figure 2. AHP matrix (A)

149

150

$$\lambda_{max} = \sum_{j=1}^n \alpha_{ij} \frac{w_j}{w_i} \quad (Eq. 1)$$

151 Where:  $\lambda_{max}$  = the largest eigenvalue;  $\alpha_{ij}$  = judgment;  $W_i$  &  $W_j$  = numerical weights for judgment  
152  $\alpha_{ij}$ .

153

$$(A - \lambda_{max} I)X = 0 \quad (Eq. 2)$$

154 Where: A = AHP matrix;  $\lambda_{max}$  = the largest eigenvalue; I = Unique matrix; X = eigenvector.

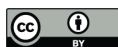

155

156 In addition, the assignment of weights (~~the degree of importance~~) to each criterion relates to the  
157 process of the experts' logical and analytical thinking, which is tested for each matrix with  
158 Consistency Ratio (CR) statistics. ~~In case,~~ this statistics is less than 0.1 ( $CR < 0.1$ ) the experts'  
159 answers are logical. Following the testing for consistency, the weights are aggregated to  
160 determine ranking of decision alternatives (the weights) for each criteria. Therefore, in this  
161 research, AHP method is applied to calculate the degree of importance of each criterion  
162 influencing **on seismic microzonation level of ground shaking** in a region using interview data of  
163 10 specialized experts in seismology, earthquake engineering, geology, tectonics and structural  
164 engineering.

165

166

167

### 168 **2.2.2. Fuzzy Logic (FL) method**

169 Fuzzy logic is a method of “approximating modes of reasoning” (Novák et al., 2012), and it is a  
170 mathematical tool that deals with uncertainty in a different way that can relate independent to  
171 dependent variables. Zadeh (1965) introduced Fuzzy set theory **Indicating** that the boundary is  
172 not precise and the gradual change is expressed by a membership function, and it changes from  
173 non-membership to membership in a fuzzy set (Eq. 3). The characteristic function ~~can be~~  
174 ~~assigned a value between 0 to 1.~~ Each membership function is represented by a curve that  
175 indicates the assignment of a membership degree in a fuzzy set to each value of a variable. Curves  
176 of the membership functions can be linear, triangles, trapezoids, bell-shaped, or have more  
177 complicated shapes (Figure 3) ~~depend~~ on the purpose of the subject (Demiccio and Klir, 2003).

178

$$179 A_a = \{x \in X \mid \mu_A(x) \geq a\} \quad (Eq. 3)$$

180 Where  $A_a$  is called the a-cut or a-level set of A, and  $\mu_A(x)$  represents membership degree of the  
181 element x.

182

183 Figure 3. Fuzzy membership functions (After Mancini, 2012)

184



185 Fuzzy systems are mainly based on expert knowledge to formalize reasoning in natural language  
186 mostly using sets of fuzzy inference rules or “if-then” rules (Eq. 4).

187

188 *If x is A then y is B* (Eq. 4)

189

190 As membership functions curve can easily be changed by small increments based on expert  
191 knowledge, therefore, fuzzy logic can characterize and model geologic systems in an efficient  
192 way (Klir, 2004;Demicco and Klir, 2003). Therefore, in this research using Fuzzy set, the  
193 uncertainties in producing microzonation map of ground shaking can be managed by defining  
194 fuzzy membership functions for each criterion. This happens by assigning meaningful values (0  
195 to 1) to each individual (sub criteria) of each criterion through interviewing 10 specialized  
196 experts. For the purpose of defuzzification, largest of maximum method was used that the precise  
197 value of the variable output is one of which the fuzzy subset has the maximum truth-value  
198 (Mancini et al., 2012).

199

### 200 **2.3. Data gathering**

201 In order to identify influencing criteria in seismic microzonation of ground shaking the required  
202 data were collected through a literature review, and semi-structured interviews with 10 experts  
203 who were involved in the geology, seismology, tectonic and structural engineering, and  
204 geomorphology fields. They were asked about the criteria that can influence seismic microzo  
205 nation level of ground shaking, and then these data were analyses using AHP and FL methods as  
206 explained in the following:

207

#### 208 **2.3.1. Determining the relevant criteria by reviewing literature**

209 The potential criteria influencing seismic microzonation of ground shaking were determined  
210 through reviewing previous research. By reviewing documents on earthquake engineering,  
211 seismology, geology, tectonic and structural engineering, geomorphology and seismic  
212 microzonation reports and guidelines (Fäh et al., 1997;Ding et al., 2004;Molina et al.,  
213 2010;Mundepi et al., 2010;Marulanda et al., 2012;Hassanzadeh et al., 2013;Federal Emergency  
214 Management Agency (FEMA), 2014;Fraume et al., 2014;Grelle et al., 2016;Grelle et al., 2014;SM



215 Working Group, 2015;Rehman et al., 2016;Nwe and Tun, 2016;Global Earthquake Model (GEM),  
216 2017;CAPRA, 2017;Michel et al., 2017;Trifunac, 2016;Hassanzadeh and Nedovic-Budic, 2016),  
217 ~~in total 14 criteria were recognized that can influence seismic microzonation levels in a study area~~  
218 (Table 1).

219

220 Table 1.Relevant criteria that influence on seismic microzonation

221

222

### 223 2.3.2. Experts' Knowledge data

224 *a) Interviewing disaster managers (semi-structured interviews) to determine the*  
225 *important criteria*

226 The most important criteria were determined by conducting a semi-structured interview with 10  
227 experts using the snowball sampling or chain-referral sampling method (Biernacki and Waldorf,  
228 1981). In this study, all 10 interviewees were highly experienced and had been involved in  
229 seismic microzonation studies. The average age of the sampled individuals was 43 years, and all  
230 of them had a postgraduate degree.

231 A list of criteria that were identified by reviewing previous studies were given to the experts and  
232 they were requested to add other criteria if they thought they were applicable. They were asked  
233 to rank each criterion using a five-point Likert Scale (Likert, 1932), so respondents could choose  
234 the option that best reflected their opinion on each criterion. When surveying many people on  
235 the same criterion, the five codes could be summed up, averaged or calculate the mode, indicating  
236 overall positive or negative orientation towards that criterion. This was the basis from which this  
237 method was used to identify the degree of importance for each criterion in **seismic microzonation**  
238 **of ground shaking** in a region. Therefore, in order to elicit the most relevant criteria, the  
239 significance of specific factors were measured on a five-point Likert Scale where, 1 represents  
240 'not important at all', 3 'of little importance', 5 'of average Importance', 7 'very important', and  
241 9 'extremely important' (Likert, 1932;Jamieson, 2004). The collected data ~~from experts~~  
242 analysed and criteria with mean ratings above '5' ('of average important') were selected (Table  
243 2). These ~~are~~ considered for further analysis using the Analytic Hierarchy Process (AHP) method.





244

245

Table 2. The average importance criteria based on 5-point Likert Scale

246

***b) Interviewing disaster managers (structured interviews) in order to collect data for computing the relative importance (weights) of the criteria***

247

248

A questionnaire based on AHP matrix (A) was developed for a pair-wise comparison of the relative importance of the criteria for calculating the weights (priority ranking) of each criterion.

249

250

As AHP is a subjective method therefore a large sample size is not needed (Cheng and Li, 2002; Lam and Zhao, 1998). Therefore, data were collected by interviewing 10 experts (the same

251

252

experts who were interviewed in the first round) based on the structured questionnaire (closed-ended questions). They were asked to compare the relative importance of each criterion against

253

254

all others, based on Saaty's scale by verbal preferences (Saaty, 1980). A pair-wise comparison

255

that was carried out with an expert is shown in Table 3. These data are used by the AHP method

256

to compute the weight of each criterion as explain previously.

257

258

Table 3. The results of pair-wise comparisons of the selected criteria with each other based on

259

the AHP matrix

260

261

***c) Determining fuzzy set and fuzzification of thresholds of sub-criteria for each criterion***

262

In the next step, since each criterion and its sub-criteria has different effect on the seismic

263

microzonation of ground shaking level in a region, fuzzy membership functions (MFs) for sub

264

criteria of each criterion are defined in that numerical analyses of their effect would be computed.

265

As, designed parameters of each membership function depends on experts knowledge, then

266

number of memberships, the shape, the positioning, and the overlay area of memberships of each

267

MFs for each criterion would be different. To conduct this analysis, 10 experts were interviewed

268

regarding membership degree of sub criteria of each criterion, and mode of each sub criteria was

269

calculated and MFs for each criterion was depicted as described in the following:

270

- Thickness of soil and sediments: an effective factor in site effect assessment is the thickness of

271

sediments. Rezaei et al. (2009) (2009) state that the soil thickness shows a direct relationship to



272 damage rate observations in the Bam earthquake. This layer was produced by 245 geophysical,  
273 geotechnical, and sedimentological sample sites across the city. The alluvial thickness varies in  
274 different parts of the city. In the northern part of the city, the **sediment** thickness ranges from 0 m,  
275 where bedrock is exposed beneath Arg-e-Bam, to 90 m across most of the northern half of the  
276 study area. Toward the south and center of the study area, sediment thickness increases over a  
277 short distance, to more than 270 m. This defines a subsurface of high sediment thickness that  
278 extends across the entire study area from west to east and underlies south-central Bam. Therefore,  
279 based on a direct relationship between the damage rate and alluvial thickness (Rezaei et al.,  
280 2009;Marie Nolte, 2010). MF for this criterion is depicted in figure 4a.

281

282 - Consolidation and strength of soil and sediments: It has been frequently observed that earthquake  
283 damage is greater in settlements located on unconsolidated and soft soils than in those sited on  
284 stiff soils or hard rock. For example, in Bam earthquake strong amplification occurred due to the  
285 extremely soft clay layers that caused high-rise buildings to collapse (Jafari et al., 2005). Another  
286 example was the Loma Prieta earthquake that happened in 1989, where much of the damage  
287 occurred in the central San Francisco Bay area at sites underlain by thick deposits of soft clay soils  
288 (Stewart, 1997). The soil classification has been ~~done~~ based on different thresholds for the average  
289 shear wave velocity ( $V_s$ ) to a depth of 30m by the National Earthquake Hazard Reduction Program  
290 (NEHRP) to characterize sites for purposes of estimation amplification of seismic motions. This  
291 standard has applied in Unified Building Code (Dobry et al., 2000) and Eurocode8 (Sabetta and  
292 Bommer, 2002;Kanlı et al., 2006). Based on this classification in areas on unconsolidated  
293 sediments, shear wave velocity reduces, and expected amplification during earthquakes can be  
294 increased. Therefore, according to this MFs for each class have been calculated as shown in figure  
295 4b.

296

297 - Type of soil and particle size distribution of sediments: It has long been recognized that the  
298 destructiveness of ground shaking during earthquakes can be significantly worsened by the type  
299 of local soil and subsurface sediment conditions. In past events, the observed variability in seismic  
300 intensity and structural damage severity has often been attributed to the variability of soil and  
301 subsurface sediment stratigraphy in a given area. Among the geotechnical properties of soil and  
302 sediments, grain size is one of the most important criteria (Assimaki et al., 2006;Phoon et al.,



303 2006). In the study area, Rezaei et al. (2009) identified eight sediment types: clay, silt, sand,  
304 granules, pebbles, cobbles, and boulders. They stated that the grain size in the shallow subsurface  
305 (<10 m) decreases across the city from south to north and increases with depth. Their investigation  
306 showed that fine-grained soils and sediments (clay, clayey sand, cohesive sandy mud, and cohesive  
307 muddy sand) dominated the northern part of the city at shallow depths. In the central part of the  
308 city, fine-grained sediments changed laterally to coarse-grained sediments (poorly sorted sand,  
309 well-rounded gravel, poorly sorted gravel, and muddy or sandy gravel) which dominated in the  
310 south part of the city. As a rule, it can be assumed that, the smaller the grain size of sediments, the  
311 less the shear waves velocity and therefore the greater the effect of the seismic wave on the  
312 destruction level of buildings (Rezaei et al., 2009;Assimaki et al., 2006;Phoon et al., 2006).  
313 Therefore, the MFs for each specific grain size are calculated in **Figure 4c**.

314

315 - Depth of groundwater: Research on the effects of groundwater shows it can magnify an  
316 earthquake's damage. The most well known effect is liquefaction. The geologic and hydrologic  
317 factors that affect liquefaction susceptibility are the age and the type of sedimentary deposits, the  
318 looseness of cohesions ~~less sediments~~ and the depth to the groundwater table (Tinsley et al., 1985).  
319 The liquefaction is mostly limited to water-saturated, cohesions less sediments, and granular  
320 sediments at depths less than 15m (Iguchi and Tainosho, 1998;Sitharam, 2010). Noack and Fah  
321 (2001) categorized it by the depth of the water table, which is split into three classes where the  
322 weight of the class increases while the groundwater table decreases (Fah et al., 1997). Therefore,  
323 due to the geological conditions in Bam, liquefaction is considered of minor importance because  
324 Talebian et al. (2004) and Rezaei et al. (2009) **found water saturated sands in very few places,**  
325 **however, measured microtremore data demonstrated more applification in areas with high**  
326 **groundwater levels**. Accordingly, MFs for each class of groundwater depth are computed as shown  
327 in figure 4d.

328 - **Type of surficial rock**: Type of **surficial** rocks can effect on seismic microzonation level of ground  
329 shaking in each region. Three main types of rock based on their formation process include igneous,  
330 metamorphic, and sedimentary rocks. Each type has its own sub-categories and what matter in this  
331 research is how hard or soft and how dense the specific type of rock is in ~~compare~~ with the other  
332 types. Geological Strength Index (Geological Survey of Iran (GSI)) of "rock masses depends on



333 rock's material, the amount of joints and their relations, alteration, and presence of water" (Hoek  
334 and Brown, 1997). There are many rock types in the nature that GSI can be calculated for any of  
335 them based on their condition, and then can be fuzzified addressing their effect on seismic  
336 microzonation level of ground shaking. There are five classes of GSI including very good, good,  
337 fair, poor and very poor based on their surface quality and interlocking of rock pieces from  
338 massive, blocky, very blocky, disintegrated, and laminated/ sheered (Marinos et al., 2007). The  
339 GSI values categorized in five classes including very low, low, medium, high and very high levels.  
340 These classes shows the geological strength of rocks that the high and very high GSI demonstrate  
341 high to very high strength of rocks. Therefore, previous studies demonstrates that in massive rocks,  
342 high GSI values, seismic waves passes quickly and therefore have small influence in seismic  
343 microzonation level of ground shaking, and vice versa if GSI value gets to the lower values. Thus,  
344 in fuzzyfication process of surficial rocks, the rock with very high GIS assign 0 and the rocks with  
345 very low GSI assign 1 (Figure 4e). Furthermore, the criterion of type of bedrock acts the same as  
346 surficial rock type criterion as explained above. Type of bedrock rarely changed over a small extent  
347 with homogenous lithology. However, it was concern of experts in determining seismic  
348 microzonation of ground shaking.

349 - ~~Slope surface~~; Bisch et al. (2012) reported that the effects of slope angle on topographic  
350 amplification factor. They classified the slope angle to three categories: 0-15 with no effect, 15-30  
351 degree with 1.2 and more than 30 degree with 1.4 amplification coefficients. Bouckovalas and  
352 Papadimitriou (2005) investigated that the influence of slope in amplifying the peak horizontal  
353 seismic ground acceleration in front and behind the crest. Grelle et al. (2016) presented formulae  
354 for topographic amplification on slope surface. These studies indicated that with the increase in  
355 slope angle the amplification factor would be increased. This can be a basis for depicting MFs of  
356 this criterion (Figure 4f).

357 - Topography irregularities: Seismic amplification has been witnessed in several earthquakes due  
358 to topographical changes (Geli et al., 1988;Paolucci, 2002). Bisch et al. (2012) classified the site  
359 in two classes of "isolated cliff and ridge with crest width significantly less than base width" (CEN  
360 European Committee for Standardisation, 1994, p 93). However, this seems simplistic, as it does  
361 not consider the elevation differences. Furthermore, Grelle et al. (2016) presented an equation that  
362 considered the local slope height, relief height, regional share wave velocity and relief ratio. In

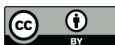

363 addition, several calibration constants should be calculated using 2d numerical analysis for each  
364 study area to compute topographic effects on seismic microzonation of ground shaking. Lee et al.  
365 (2009) found out that the amplification on top of elevated surfaces with small extent was much  
366 higher than valleys and flat areas. **Therefore, the elevation differences ( $dH$  m) between the bases**  
367 **of a hill with the top of the hill and also the area ( $A$  m<sup>2</sup>) of the top part of the hill are the main**  
368 **driver in computing the amount of amplification of seismic waves and can effect on seismic**  
369 **microzonation level of ground shaking.** Therefore, the higher the elevation differences and the  
370 smaller the area of the elevated surface, the ground in this part will be more amplified. Here, using  
371 fuzzy logic and experts' knowledge the effect of topography in terms of elevation differences in  
372 determining seismic microzonation of ground shaking in the study area is defined (Figure 4g).

373 Figure 4. Membership functions (MFs) based on fuzzy logic system: Thickness of soil and  
374 sediments (a), Consolidation and strength of soil and sediments (b), Type of soil and particle  
375 size distribution of sediments (c), Depth of groundwater (d), Type of surficial rock and  
376 bedrock (e), Slope surface (degree) (f), Topography irregularities (g).

### 377 2.3.3. *Preparing thematic data*

378 The required data were collected from relevant organizations and documents and they were  
379 **converted to GIS files.** These thematic data included: thickness of soil and sediments (Figure 5a),  
380 consolidation and strength of soil and sediments (Figure 5b), type of soil and particle size  
381 distribution of soil and sediments (Figure 5c and d), depth of groundwater (Figure 5e), type of  
382 surficial rock (Figure 5f), **topography of surface** (Figure 5g), and slop surface (Figure 5h) layers.  
383

384 Figure 5. Thematic Layers of Bam city: Thickness of soil and sediments (m) (a), Consolidation  
385 and strength of soil and sediments, (b), Sediment type at depth of 1 meter (c) and at depth of 9  
386 meters (d), Groundwater level (e), Type of surficial rock(f), Topography (g) and Slop (h) layers.

### 387 2.3.4. *Preparing control data*

388 National Cartographic Center (2003) and Hisada et al.(2005) were collected data on the destruction  
389 level of buildings after math of the [bam](#) earthquake (Figure 6a and b). Lashkari Pour et al. (2006)



390 and Askari et al. (2004) were collected data on the dominant frequency of soil (Figure 6c and d)  
391 using microtremor measurements in Bam city. These datasets were used to validate the model.

392

393 Figure 6. Control data: Actual building destruction level (Hisada et al., 2005) (a), percentage of  
394 damage to buildings caused by the Bam earthquake in 2003 (National Cartographic Center  
395 (NCC), 2003) (b), Dominant frequency by(LashkariPour et al., 2006) (c) and by (Askari et al.,  
396 2004) (d) using Microtremor field measurement.

397

### 398 **2.3. Spatial combination methods and overlay rules**

399 The spatial Multi Criteria Decision Making (MCDM) approach is a decision-aid and a  
400 mathematical tool that combines and transforms spatially referenced data into a raster layer with  
401 a priority score. (Roy, 1996;Malczewski, 2006). Several combination methods have been  
402 developed, such as Boolean operations (Malczewski, 1999), weighted linear combination (WLC:  
403 combining the normalized criteria based on overlay analysis) (Voogd, 1983;Drobne and Lisec,  
404 2009;O'Sullivan and Unwin, 2010) (Eq. 5), ordered weighted averaging (OWA) (Yager,  
405 1988;Rinner and Malczewski, 2002), and Analytical Hierarchy Process (AHP) based on the  
406 additive weighting methods (Zhu and Dale, 2001). In this research, the AHP method (Saaty,  
407 1980) was used to derive the weights associated with criteria and Fuzzy Logic method was  
408 applied to compute sub-criteria's membership functions (MFs) in order to produce the seismic  
409 microzonation of ground shaking. Then, the degree of membership of each sub-criteria  
410 (calculated by Fuzzy Logic method) is assigned to the corresponding sub-criteria. Next, this is  
411 multiplied by the weight of corresponding criteria (calculated by AHP method). Finally, they are  
412 summed up in a linear manner using WLC method (Eq. 5) to develop the model (Larzesh model)  
413 for production of the seismic microzonation of ground shaking in the study area.

$$A_i = \sum W_j * X_{ij} \quad (Eq. 5)$$

414 Where:  $w_j$  = the calculated weight of criteria  $j$ , and  $X_{ij}$  = the degree of membership of the  $i$ th  
415 sub-criteria with respect to the  $j$ th criteria, and  $A_i$  = the seismic microzonation of ground  
416 shaking index in  $i$ th location.

417

### 418 **2.4. Validation and comparison methods**



419 In order to validate the model, as categorical variables are the main driver of model development in  
420 this research, therefore relevant measures such as Overall Accuracy and Kappa statistic will be  
421 applied to measure the performance of the model.

422 **a) Overall accuracy (OA)**

423 Accuracy assessments determine the quality of the results derived from data analysis or a model,  
424 in comparison with a reference or ground truth data (where ground truth data are assumed to be  
425 100% correct) (Congalton and Green, 2009). The accuracy assessment can be obtained by  
426 creating a contingency table of counts of observations, with calculated, estimated or predicted  
427 data values as rows and with reference data values as columns. The values in the shaded cells  
428 along the diagonal represent counts for correctly classified observations, where the reference data  
429 matches the predicted value. This contingency table is often referred to as a confusion matrix,  
430 misclassification matrix, or error matrix (Czaplewski, 1992; Congalton and Green, 2009) (Eq. 6).

$$OA = \frac{\sum_{k=1}^q n_{kk}}{n} \times 100 \quad (Eq. 6)$$

431

432 Where: OA = Overall Accuracy,  $n_{kk}$  = Values in diagonal cell of the matrix (correctly classified  
433 observations), and  $n$  = number of observations.

434 **b) Kappa analysis**

435 The kappa statistic ( $\kappa$ ) (Sim and Wright, 2005; Congalton and Green, 2008) calculates degree of  
436 agreement between classes of two independent observe measuring the same property. The degree  
437 of Kappa would be 0 for a random classifies and 1 for classification. Degree of agreement of  
438 Kappa interprets as follows: less than 0.4: poor agreement, 0.4 and 0.8: moderate agreement,  
439 and greater than 0.80: strong agreement (Congalton and Green, 2008) (Eq. 7).

440

$$k = \frac{P_o - P_e}{1 - P_e} \quad (Eq. 7)$$

442 Where:  $P_o$  = the relative observed agreement among raters,  $P_e$  = the hypothetical probability of chance  
443 agreement.

444



445 **Results and discussion**

446 In order to produce the seismic microzonation of ground shaking the most important criteria were  
447 identified and then were weighted using AHP pair-wise comparison method. The higher weight  
448 belong to thickness of soil and sediments (0.271), consolidation and strength of soil and  
449 sediments (0.207), type of soil and particle size distribution of sediments (0.177), depth of  
450 groundwater (0.171), topography of surface (0.054), type of surficial rock (0.041), slop surface  
451 (0.040), and type of bedrock (0.040) were considered. Then, based on Fuzzy Logic method sub-  
452 criteria of each criterion was fuzzified and membership functions for them was defined. Next,  
453 these criteria were combined based on the Weighted Linear Combination (WLC) (Drobne and  
454 Lisec, 2009) in GIS to develop the model for producing the seismic microzonation of ground  
455 shaking map of the study area, as it is proposed in the following (Eq. 8):

456

$$457 \quad A_j = \sum(wS_s \cdot FS_{SS}) + (wT_A \cdot FS_{TA}) + (wS_A \cdot FS_{SA}) + (wD_{GW} \cdot FS_{D_{GW}}) + (wT_R \cdot FS_{TR})$$
$$458 \quad + (wT_{Br} \cdot FS_{TBR}) + (wT_S \cdot FS_{TS}) + (wS_L \cdot FS_{SL}) \quad (Eq. 8)$$

459 *Where:  $A_j$  = seismic microzonation of ground shaking, weights of each criterion:  $wS_s$  = consolidation*  
460 *and strength of soil and sediments,  $wT_A$  = thickness of soil and sediments,  $wS_A$  = Type of soil and particle*  
461 *size distribution of sediments,  $wD_{GW}$  = depth of groundwater,  $wT_R$  = type of surficial rock,  $wT_{Br}$  =*  
462 *type of bedrock,  $wT_S$  = topography of surface,  $wS_L$  = slop surface, and fuzzified sub-criteria of each*  
463 *criterion:  $FS_{SS}$  = consolidation and strength of soil and sediments,  $FS_{TA}$  = thickness of soil and sediments*  
464 *,  $FS_{SA}$  = Type of soil and particle size distribution of soil and sediments,  $FS_{D_{GW}}$  =*  
465 *depth of groundwater,  $FS_{TR}$  = type of surficial rock,  $FS_{TBR}$  = type of bedrock,  $FS_{TS}$  = topography of*  
466 *surface,  $FS_{SL}$  = slop surface.*

467

468 Figure 7 displays the resulting microzonation map of ground shaking in Bam city. The areas with  
469 **high to very high susceptibility of amplification** are located in the north, east and northeast part  
470 of Bam city. This is due to the widespread unconsolidated sediments, low groundwater level in  
471 combination with high sediment thickness.

472 In order to validate the results, OA and Kappa methods were applied comparing the output of  
473 model with the measured predominant frequency (Askari et al., 2004; LashkariPour et al., 2006)  
474 in the study area. The results demonstrated 80% and 82% (Table 4a and b) for OA and 0.74 and





475 0.75 for Kappa (Table 5) indicating a good fit of the model's output with the measured data.  
476 Moreover, overlaying the building destructions caused by the Bam earthquake in 2003 (Hisada  
477 et al., 2005; National Cartographic Center (NCC), 2003) shows high destruction levels happened  
478 in locations with high ground shaking which were located in central, north and northeast part of  
479 the city.

480

481 Figure 7. Seismic microzonation of ground shaking map of Bam city

482

483 Table 4. Coparesion between the model's output with the measured predominant frequaney in Bam  
484 city by Askari et al. (2004) (a)c and LashkariPour et al. (2006) (b).

485

486 Table 5. Kappa coefficient and OA

487

488 In this study, we have focused on the site effect and local geology properties of a site that have a  
489 massive influence on seismic microzonation of ground shaking in the study area. To deal with  
490 related uncertainties in preparing seismic microzonation, the most important criteria were selected,  
491 weighted and the fuzzified. Criteria with high uncertainty degree such as distance of active fault  
492 to the site, depth and magnitude of the probable earthquake were not considered because there was  
493 no possibility to exactly find out where and how an earthquake will be triggered. Therefore, only  
494 the criteria with known location (x and y) and known characteristics were taken into consideration.  
495 Furthermore, to deal with uncertainties Fuzzy Logic is a suitable approach as we can define  
496 membership function of the effect of each criterion in the amplification of ground shaking by  
497 interviewing 10 experts and obtaining expert's knowledge. This can result in realistic output  
498 regarding the behavior of each criterion in ground shaking calculation.

499 The newly developed model uses AHP and Fuzzy Logic (Zadeh, 1965) to deal with complexities  
500 and uncertainties in data analyses in weighting the criteria and fuzzifying the sub-criteria of each  
501 criterion. Although, in studies for evaluating seismic microzonation in Bangalore (India) (Sitharam  
502 and Anbazhagan, 2008), Dehli (Mohanty et al., 2007), Haldia (India) (Mohanty et al., 2007), Erbaa  
503 (Turkey) (Akin et al., 2013) and Al-Madinah (Moustafa et al., 2016) only AHP method was applied  
504 to weight the criteria, and none of these studies considered weighting of sub criteria for each  
505 criterion even using other methods.



506 Few researchers have considered direct properties of influencing factors in assessing ground  
507 shaking amplification. Even, in evaluating seismic response developed models such as  
508 SiSeRHMap v1.0 (Grelle et al., 2016) and GIS Cubic Model (Grelle et al., 2014), the researchers  
509 have applied only lithodynamic, stratigraphic and topographic effects as influencing factors. The  
510 current research considers direct properties of each criteria and tries to manage uncertainties in  
511 criteria and sub-criteria of each criterion via weighting and fuzzification process using experts'  
512 knowledge and the use of direct properties of criteria. These processes can be extended in more  
513 details, which are subject to more investigation in the future.

514

#### 515 **Conclusions**

516 Larzesh model introduces a new method based on AHP and Fuzzy Logic rules that enables experts  
517 to produce seismic microzonation of ground shaking using direct properties of lithological,  
518 sedimentological, geological, hydrological and topographical effects in a study area using experts'  
519 knowledge in weighting and fuzzifying criteria and sub criteria that can be readily perceived and  
520 consulted.

521 The application of the model was carried out in the urban area of the Bam city in Iran. The results  
522 demonstrated high to very high ground shaking amplifications were located in central, east, and  
523 northeast to north part of the city that was confirmed comparing with measured microtremor data  
524 on predominate frequency in the study area. However, as the proposed model is a spatial  
525 computational tool, the validation of output in producing seismic microzonation of ground shaking  
526 strictly dependent on the quality and preparation of input data.

527 In conclusion, the model enable disaster managers, planners, and policy makers in producing  
528 seismic microzonation of ground shaking and making informed decision in urban planning and  
529 designing appropriate plans for urban development, especially in areas with high seismic activities.

530

#### 531 **Acknowledgements**

532 The authors would like to express their appreciation to Institute of Science and High Technology  
533 and Environmental Sciences, Graduate University of Advanced Technology, Kerman, Iran for  
534 financial support of this study under reference number of 7/C/95/2053.

535

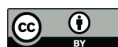

536 **References**

- 537 Akin, M. K., Topal, T., and Kramer, S. L.: A newly developed seismic microzonation model of Erbaa  
538 (Tokat, Turkey) located on seismically active eastern segment of the North Anatolian Fault Zone  
539 (NAFZ), *Natural Hazards*, 65, 1411-1442, [10.1007/s11069-012-0420-1](https://doi.org/10.1007/s11069-012-0420-1), 2013.
- 540 Askari, F., Azadi, A., M., D., and M.R. Ghayamghamian, E. H., H. Hamzehloo, M.K. Jafari, M. Kamalian, M.  
541 Keshavarz, O. Ravanfar, A. Shafiee, A. Sohrabi-Bidar: Preliminary Seismic Microzonation of Bam,  
542 *Journal of Seismology and Earthquake Engineering*, 5, 2004.
- 543 Assimaki, D., Steidl, J., and Liu, P.: Attenuation and Velocity Structure for Site Response Analyses via  
544 Downhole Seismogram Inversion, *Pure appl. geophys.*, 163, 81-118, [10.1007/s00024-005-0009-7](https://doi.org/10.1007/s00024-005-0009-7),  
545 2006.
- 546 Atkinson, G. M., and Boore, D. M.: Earthquake ground-motion prediction equations for eastern North  
547 America, *Bulletin of the Seismological Society of America*, 96, 2181-2205, 2006.
- 548 Atkinson, G. M., Ghofrani, H., and Assatourians, K.: Impact of induced seismicity on the evaluation of  
549 seismic hazard: Some preliminary considerations, *Seismological Research Letters*, 86, 1009-1021,  
550 2015.
- 551 Beck, J. L., and Hall, J. F.: Factors contributing to the catastrophe in Mexico City during the earthquake of  
552 September 19, 1985, *Geophysical Research Letters*, 13, 593-596, 1986.
- 553 Biernacki, P., and Waldorf, D.: Snowball sampling: Problems and techniques of chain referral sampling,  
554 *Sociological methods & research*, 10, 141-163, 1981.
- 555 Bisch, P., Carvalho, E., Degee, H., Fajfar, P., Fardis, M., Franchin, P., Kreslin, M., Pecker, A., Pinto, P., and  
556 Plumier, A.: Eurocode 8: seismic design of buildings worked examples, Joint Research Centre  
557 European Union, Luxembourg, 2012.
- 558 Boore, D. M.: Simulation of ground motion using the stochastic method, in: *Seismic Motion, Lithospheric*  
559 *Structures, Earthquake and Volcanic Sources: The Keiiti Aki Volume*, Springer, 635-676, 2003.
- 560 Boostan, E., Tahernia, N., and Shafiee, A.: Fuzzy—probabilistic seismic hazard assessment, case study:  
561 Tehran region, Iran, *Natural Hazards*, 77, 525-541, 2015.
- 562 Bouckovalas, G. D., and Papadimitriou, A. G.: Numerical evaluation of slope topography effects on  
563 seismic ground motion, *Soil Dynamics and Earthquake Engineering*, 25, 547-558, 2005.
- 564 Campbell, K. W.: Prediction of strong ground motion using the hybrid empirical method and its use in  
565 the development of ground-motion (attenuation) relations in eastern North America, *Bulletin of the*  
566 *Seismological Society of America*, 93, 1012-1033, 2003.



- 567 Probabilistic Risk Assessment (CAPRA): <https://www.ecapra.org/software>, access: 17 April 2017, 2017.
- 568 CEN European Committee for Standardisation: Eurocode 8. Design Provisions for Earthquake Resistance  
569 of Structures—Part 5: Foundations, Retaining Structures and Geotechnical Aspects. ENV 1998-5,  
570 Brussels, 1994.
- 571 Cheng, E. W. L., and Li, H.: Construction partnering process and associated critical success factors:  
572 quantitative investigation, *Journal of Management in Engineering*, October, 194–202, 2002.
- 573 Congalton, R. G., and Green, K.: Assessing the accuracy of remotely sensed data: principles and  
574 practices, CRC press, 2008.
- 575 Congalton, R. G., and Green, K.: Assessing the Accuracy of Remotely Sensed Data: Principles and  
576 Practices, CRC Press, Boca Raton, FL, USA, 2009.
- 577 Cornell, C. A.: Engineering seismic risk analysis, *Bulletin of the seismological society of America*, 58,  
578 1583-1606, 1968.
- 579 Czaplewski, R. L.: Misclassification bias in areal estimates, *Photogrammetric engineering and Remote*  
580 *Sensing*, 58, 189–192, 1992.
- 581 Demicco, R. V., and Klir, G. J.: Fuzzy logic in geology, Academic Press, 347 pp., 2003.
- 582 Ding, Z., Chen, Y., and Panza, G.: Estimation of site effects in Beijing City, *Pure appl. geophys.*, 161, 1107-  
583 1123, 2004.
- 584 Dobry, R., Borcherdt, R. D., Crouse, C. B., Idriss, I. M., Joyner, W. B., Martin, G. R., Power, M. S., Rinne, E.  
585 E., and Seed, R. B.: New site coefficients and site classification system used in recent building seismic  
586 code provisions, *Earthquake Spectra*, 16, 41-67, 2000.
- 587 Drobne, S., and Lisec, A.: Multi-attribute Decision Analysis in GIS: Weighted Linear Combination and  
588 Ordered Weighted Averaging, *Informatica (Slovenia)*, 33, 459-474, 2009.
- 589 Fah, D., Rüttener, E., Noack, T., and Kruspan, P.: Microzonation of the city of Basel, *Journal of*  
590 *Seismology*, 1, 87-102, 10.1023/a:1009774423900, 1997.
- 591 Fäh, D., Rüttener, E., Noack, T., and Kruspan, P.: Microzonation of the city of Basel, *Journal of*  
592 *Seismology*, 1, 87-102, 10.1023/a:1009774423900, 1997.
- 593 Federal Emergency Management Agency (FEMA): Multi-hazard Loss Estimation Methodology,  
594 Earthquake Model, HAZUS®MH MR5, User Manual, Washington, D.C., 2014.
- 595 Figueira, J., Mousseau, V., and Roy, B.: ELECTRE methods, in: Multiple criteria decision analysis: State of  
596 the art surveys, Springer, 133-153, 2005.



- 597 Fraume, M., Cristina, M., Carreño Tibaduiza, M. L., Cardona Arboleda, O. D., Ordaz Schroeder, M. G., and  
598 Barbat Barbat, H. A.: Probabilistic earthquake risk assessment of Barcelona using CAPRA, Second  
599 European Conference on Earthquake Engineering and Seismology, 2014, 1-3,  
600 Geli, L., Bard, P.-Y., and Jullien, B.: The effect of topography on earthquake ground motion: a review and  
601 new results, *Bulletin of the Seismological Society of America*, 78, 42-63, 1988.  
602 Geological Survey of Iran (GSI): Geological Map of Iran, 1:100,000 Series, Sheet 7648, Bam, Iran, 1993.  
603 Global Earthquake Model (GEM): The OpenQuake-engine User Manual. Global Earthquake Model (GEM)  
604 Technical Report 2017-02., 193 2017.  
605 Grelle, G., Bonito, L., Revellino, P., Guerriero, L., and Guadagno, F. M.: A hybrid model for mapping  
606 simplified seismic response via a GIS-metamodel approach, *Natural Hazards and Earth System*  
607 *Sciences*, 14, 1703, 2014.  
608 Grelle, G., Bonito, L., Lampasi, A., Revellino, P., Guerriero, L., Sappa, G., and Guadagno, F. M.:  
609 SiSerHMap v1. 0: a simulator for mapped seismic response using a hybrid model, *Geoscientific*  
610 *Model Development*, 9, 1567-1596, 2016.  
611 Hassanzadeh, R., Nedović- Budić, Z., Alavi Razavi, A., Norouzzadeh, M., and Hodhodkian, H.: Interactive  
612 approach for GIS-based earthquake scenario development and resource estimation (Karmania hazard  
613 model), *The international journal of Computers & Geosciences*, 51, 324-338,  
614 10.1016/j.cageo.2012.08.016, 2013.  
615 Hassanzadeh, R., and Nedovic-Budic, Z.: Where to go first: prioritization of damaged areas for allocation  
616 of Urban Search and Rescue (USAR) operations (PI-USAR model), *Geomatics, Natural Hazards and*  
617 *Risk*, 7, 1337-1366, 10.1080/19475705.2015.1058861, 2016.  
618 Hinlopen, E., Nijkamp, P., and Rietveld, P.: Qualitative discrete multiple criteria choice models in regional  
619 planning, *Regional Science and Urban Economics*, 13, 77-102, 1983.  
620 Hisada, Y., Shibayama, A., and Ghayamghamian, M. R.: Building damage and seismic intensity in Bam city  
621 from the 2003 Iran, Bam, earthquake, *Bull. Earthquake Res. Inst., Univ. Tokyo*, 79 81–94, 2005.  
622 Hoek, E., and Brown, E. T.: Practical estimates of rock mass strength, *International Journal of Rock*  
623 *Mechanics and Mining Sciences*, 34, 1165-1186, 1997.  
624 Iguchi, Y., and Tainosho, Y.: Characteristics of distribution of groundwater level in the seismic damaged  
625 zone in eastern part of Kobe city due to the 1995 Hyogo-Ken Nanbu Earthquake, *Bulletin of the*  
626 *Faculty of Human Development* 5, 403-415, 1998.  
627 Jafari, M. K., Ghayamghamian, M. R., Davoodi, M., Kamalian, M., and Sohrabi-Bidar, A.: Site Effects of  
628 the 2003 Bam, Iran, Earthquake, *Earthquake Spectra*, 21, 125-136, 10.1193/1.2098266, 2005.



- 629 Jamieson, S.: Likert Scales: How to (Ab)use Them, *Medical Education*, 38, 1217-1218, 2004.
- 630 Kanlı, A. I., Tildy, P., Prónay, Z., Pinar, A., and Hermann, L.: VS30 mapping and soil classification for  
631 seismic site effect evaluation in Dinar region, SW Turkey, *Geophysical Journal International*, 165, 223-  
632 235, [10.1111/j.1365-246X.2006.02882.x](https://doi.org/10.1111/j.1365-246X.2006.02882.x), 2006.
- 633 Keeney, R. L., and Raiffa, H.: *Decisions with multiple objectives: preferences and value trade-offs*,  
634 Cambridge university press, 1993.
- 635 Klir, G. J.: Chapter 2 - Fuzzy Logic: A Specialized Tutorial, in: *Fuzzy Logic in Geology*, Academic Press,  
636 Burlington, 11-61, 2004.
- 637 Lam, K., and Zhao, X.: An application of quality function deployment to improve the quality of teaching,  
638 *International Journal of Quality Reliability Management*, 15, 389–413, 1998.
- 639 LashkariPour, G. R., Sadegh, H., and Sevizi, Z.: Comparison of predominant frequency of Bam city using  
640 seismic facies and ratio of H/V of foreshocks earthquakes., 10th Symposium of Geological Society of  
641 Iran, 2006.
- 642 Lee, S.-J., Komatitsch, D., Huang, B.-S., and Tromp, J.: Effects of topography on seismic-wave  
643 propagation: An example from northern Taiwan, *Bulletin of the Seismological Society of America*, 99,  
644 314-325, 2009.
- 645 Likert, R.: A Technique for the Measurement of Attitudes, *Archives of Psychology*, 140, 1932.
- 646 Malczewski, J.: *GIS and Multicriteria Decision Analysis*, John Wiley and Sons, New York, 1999.
- 647 Malczewski, J.: A GIS-based multicriteria decision analysis: A survey of the literature, *International*  
648 *Journal of Geographical Information Science*, 20, 703-726, 2006.
- 649 Mancini, I. M., Masi, S., Caniani, D., and Lioi, D. S.: Fuzzy logic and neuro-fuzzy networks for  
650 environmental hazard assessment, in: *Fuzzy Logic-Emerging Technologies and Applications*, InTech,  
651 2012.
- 652 Marie Nolte, E.: Earthquake risk map development using GIS and optical satellite imagery: case study for  
653 rural areas on Java, Indonesia, Center for Disaster Management and Risk Reduction Technology  
654 Projektbericht Hertz, Karlsruhe 112, 2010.
- 655 Marinos, P., Marinos, V., and Hoek, E.: Geological Strength Index (GSI). A characterization tool for  
656 assessing engineering properties for rock masses, *Underground works under special conditions*.  
657 Taylor and Francis, Lisbon, 13-21, 2007.
- 658 Marulanda, M., Carreño, M., Cardona, O., and Barbat, A.: Probabilistic assessment of seismic risk of  
659 Barcelona, Spain, using the CAPRA platform, *Buletinul Institutului Politehnic din Iasi. Sectia*  
660 *Constructii, Arhitectura*, 58, 9, 2012.



- 661 MERM: Microzonation Manual, World Institute for Disaster Risk Management, 2003.
- 662 Michel, C., Fäh, D., Edwards, B., and Cauzzi, C.: Site amplification at the city scale in Basel (Switzerland)  
663 from geophysical site characterization and spectral modelling of recorded earthquakes, *Physics and*  
664 *Chemistry of the Earth, Parts A/B/C*, 98, 27-40, 2017.
- 665 Mohanty, W. K., Walling, M. Y., Nath, S. K., and Pal, I.: First Order Seismic Microzonation of Delhi, India  
666 Using Geographic Information System (GIS), *Natural Hazards*, 40, 245-260, [10.1007/s11069-006-](https://doi.org/10.1007/s11069-006-0011-0)  
667 [0011-0](https://doi.org/10.1007/s11069-006-0011-0), 2007.
- 668 Mohanty, W. K., and Walling, M. Y.: First Order Seismic Microzonation of Haldia, Bengal Basin (India)  
669 Using a GIS Platform, *Pure appl. geophys.*, 165, 1325-1350, [10.1007/s00024-008-0360-6](https://doi.org/10.1007/s00024-008-0360-6), 2008.
- 670 Molina, S., Lang, D. H., and Lindholm, C. D.: SELENA – An open-source tool for seismic risk and loss  
671 assessment using a logic tree computation procedure, *Computers & Geosciences*, 36, 257-269,  
672 <http://dx.doi.org/10.1016/j.cageo.2009.07.006>, 2010.
- 673 Moro, M., Saroli, M., Salvi, S., Stramondo, S., and Doumaz, F.: The relationship between seismic  
674 deformation and deep-seated gravitational movements during the 1997 Umbria–Marche (Central  
675 Italy) earthquakes, *Geomorphology*, 89, 297-307, 2007.
- 676 Moustafa, S. S. R., SN Al-Arifi, N., Jafri, M. K., Naeem, M., Alawadi, E. A., and A. Metwaly, M.: First level  
677 seismic microzonation map of Al-Madinah province, western Saudi Arabia using the geographic  
678 information system approach, *Environmental Earth Sciences*, 75, 251, [10.1007/s12665-015-5073-4](https://doi.org/10.1007/s12665-015-5073-4),  
679 2016.
- 680 Mundepi, A., Galiana-Merino, J., and Lindholm, C.: Soil characteristics and site effect assessment in the  
681 city of Delhi (India) using H/V and f–k methods, *Soil Dynamics and Earthquake Engineering*, 30, 591-  
682 599, 2010.
- 683 Nath, S., and Thingbaijam, K.: Seismic hazard assessment-a holistic microzonation approach, *Natural*  
684 *Hazards and Earth System Sciences*, 9, 1445, 2009.
- 685 Report on the Bam earthquake:  
686 <http://www.ncc.org.ir/homepage.aspx?site=NCCPortal&tabid=1&lang=fa-IR>, access: May 15, 2013,  
687 2003.
- 688 Noack, T., and Fah, D.: Earthquake Microzonation: site effects and local geology; A case study for the  
689 Kanton of Basel-Stadt, 2001.
- 690 Novák, V., Perfilieva, I., and Mockor, J.: Mathematical principles of fuzzy logic, Springer Science &  
691 Business Media, 2012.



- 692 Nwe, Z. Z., and Tun, K. T.: Seismic Hazard Analysis using AHP-GIS, *Int'l Journal of Research in Chemical,*  
693 *Metallurgical and Civil Engg.*, 3, 1442-1450, 2016.
- 694 O'Sullivan, D., and Unwin, D. J.: Putting Maps Together—Map Overlay, in: *Geographic Information*  
695 *Analysis*, John Wiley & Sons, Inc., 315-340, 2010.
- 696 Panza, G. F., La Mura, C., Peresan, A., Romanelli, F., and Vaccari, F.: Chapter three-seismic hazard  
697 scenarios as preventive tools for a disaster resilient society, *Advances in geophysics*, 53, 93-165,  
698 2012.
- 699 Paolucci, R.: Amplification of earthquake ground motion by steep topographic irregularities, *Earthquake*  
700 *Engineering & Structural Dynamics*, 31, 1831-1853, 10.1002/eqe.192, 2002.
- 701 Petersen, M. D., Mueller, C. S., Moschetti, M. P., Hoover, S. M., Llenos, A. L., Ellsworth, W. L., Michael, A.  
702 J., Rubinstein, J. L., McGarr, A. F., and Rukstales, K. S.: Seismic-Hazard Forecast for 2016 Including  
703 Induced and Natural Earthquakes in the Central and Eastern United States, *Seismological Research*  
704 *Letters*, 87, 1327-1341, 2016.
- 705 Phoon, K., Nadim, F., Uzielli, M., and Lacasse, S.: Soil variability analysis for geotechnical practice, in:  
706 *Characterisation and Engineering Properties of Natural Soils*, Taylor & Francis, 2006.
- 707 Ramazi, H., and Jigheh, H. S.: The Bam (Iran) Earthquake of December 26, 2003: From an engineering  
708 and seismological point of view, *Journal of Asian Earth Sciences*, 27, 576-584, 2006.
- 709 Rehman, F., El-Hady, S. M., Atef, A., and Harbi, H. M.: PROBABILISTIC SEISMIC HAZARD ASSESSMENT  
710 METHODOLOGY AND SITE RESPONSE ANALYSIS APPLICATION TO SEISMIC MICROZONATION, *Science*  
711 *International*, 28, 2016.
- 712 Rezaei, K., Guest, B., Friedrich, A., Fayazi, F., Nakhaei, M., Beitollahi, A., and Fatemi Aghda, S.: Feed  
713 forward neural network and interpolation function models to predict the soil and subsurface  
714 sediments distribution in Bam, Iran, *Acta Geophys.*, 57, 271-293, 10.2478/s11600-008-0073-3, 2009.
- 715 Rinner, C., and Malczewski, J.: Web-enabled spatial decision analysis using ordered weighted averaging,  
716 *J Geogr Syst*, 4, 385–403, 2002.
- 717 Roy, B.: *Multicriteria methodology for decision aiding*, Kluwer Academic Publishers, Dordrecht, 1996.
- 718 Saaty, T. L.: *The Analytic Hierarchy Process: planning, priority setting, resource allocation*, McGraw-Hill  
719 International, US, 1980.
- 720 Saaty, T. L.: An Exposition of the AHP in Reply to the Paper “Remarks on the Analytic Hierarchy Process”,  
721 *Management Science*, 36, 259-268, 10.1287/mnsc.36.3.259, 1990.
- 722 Sabetta, F., and Bommer, J.: Modification of the spectral shapes and subsoil conditions in Eurocode 8,  
723 12th European Conference on Earthquake Engineering, London, UK, 2002.





- 724 Sen, Z.: Rapid visual earthquake hazard evaluation of existing buildings by fuzzy logic modeling, Expert  
725 Systems with Applications, 37, 5653-5660, 2010.
- 726 Sim, J., and Wright, C. C.: The kappa statistic in reliability studies: use, interpretation, and sample size  
727 requirements, Physical therapy, 85, 257-268, 2005.
- 728 Sitharam, T., and Anbazhagan, P.: Seismic microzonation: principles, practices and experiments, EJGE  
729 Special Volume Bouquet, 8, 2008.
- 730 Sitharam, T. G.: Technical Document on Geotechnical and Geophysical Investigation for Seismic  
731 Microzonation Studies of Urban Centers in India, National Disaster Management Authority (NDMA),  
732 Bhawan, Safdarjung Enclave, New Delhi, 123, 2010.
- 733 SM Working Group: Guidelines for Seismic Microzonation, Civil Protection Department and Conference  
734 of Regions and Autonomous Provinces of Italy, 2015,
- 735 Stewart, J.: Key Geotechnical Aspects of the 1989 Loma Prieta Earthquake, National Information Service  
736 for Earthquake Engineering, University of California, Berkeley, California, Berkeley, 1997.
- 737 Talebian, M., Fielding, E. J., Funning, G. J., Ghorashi, M., Jackson, J., Nazari, H., Parsons, B., Priestley, K.,  
738 Rosen, P. A., Walker, R., and Wright, T. J.: The 2003 Bam (Iran) earthquake: Rupture of a blind strike-  
739 slip fault, Geophysical Research Letters, 31, n/a-n/a, 10.1029/2004gl020058, 2004.
- 740 Tang, A. K.: Izmit (Kocaeli), Turkey, Earthquake of August 17, 1999 Including Duzce Earthquake of  
741 November 12, 1999: Lifeline Performance, ASCE Publications, 2000.
- 742 Teramo, A., Termini, D., Marullo, A., and Marino, A.: Fuzzy interpolators for a quick seismic  
743 microzonation, CIMSA. 2005 IEEE International Conference on Computational Intelligence for  
744 Measurement Systems and Applications, 2005., 2005, 107-108,
- 745 Tinsley, J. C., Youd, T. L., D.M., P., and Chen, A. T. F.: Evaluating liquefaction potential. In: Evaluating  
746 Earthquake Hazards in the Los Angeles Region - An Earth-Science Perspective, US Geological  
747 Survey, 263-315, 1985.
- 748 Trifunac, M. D.: Site conditions and earthquake ground motion – A review, Soil Dynamics and  
749 Earthquake Engineering, 90, 88-100, <https://doi.org/10.1016/j.soildyn.2016.08.003>, 2016.
- 750 Voogd, H.: Multicriteria Evaluation for Urban and Regional Planning, Pion, Ltd, London, 1983.
- 751 Wald, D. J.: Slip history of the 1995 Kobe, Japan, earthquake determined from strong motion,  
752 teleseismic, and geodetic data, Journal of Physics of the Earth, 44, 489-503, 1996.
- 753 Wang, Z., Carpenter, N. S., and Zhang, L.: Assessing Potential Seismic Hazards from Induced Earthquakes  
754 in the Central and Eastern United States, AAPG Eastern Section Meeting, 2016,



755 Wang, Z., Carpenter, N. S., Zhang, L., and Woolery, E. W.: Assessing Potential Ground-Motion Hazards  
756 from Induced Earthquakes, *Natural Hazards Review*, 18, 04017018, doi:10.1061/(ASCE)NH.1527-  
757 6996.0000264, 2017.

758 Yager, R. R.: On ordered weighted averaging aggregation operators in multi-criteria decision making,  
759 *IEEE Transactions on Systems, Man and Cybernetics*, B 18, 183-190, 1988.

760 Zadeh, L. A.: Fuzzy sets, *Information and control*, 8, 338-353, 1965.

761 Zadeh, L. A.: Fuzzy logic and approximate reasoning, *Synthese*, 30, 407-428, 1975.

762 Zhu, X., and Dale, A. P.: JavaAHP: a Web-based decision analysis tool for natural resource and  
763 environmental management, *Environmental Modelling and Software*, 16, 251–262, 2001.

764

765

766

767

768

769

770

771

772

773

774

775

776

777

778



779

**Tables**

780

**Table 1. Relevant criteria that influence on seismic microzonation**

|   |                                                          |    |                               |
|---|----------------------------------------------------------|----|-------------------------------|
| 1 | Thickness of soil and sediments                          | 9  | Thickness of bedrock          |
| 2 | Consolidation and strength of soil and sediments         | 10 | Morphology of bedrock         |
| 3 | Type of soil and particle size distribution of sediments | 11 | Topography of bedrock         |
| 4 | Depth of groundwater                                     | 12 | Age of alluvial and sediments |
| 5 | Topography of surface                                    | 13 | Age of bedrock                |
| 6 | Type of surficial rock                                   | 14 | Age of surficial rock         |
| 7 | Slop surface                                             |    |                               |
| 8 | Type of bedrock                                          |    |                               |

781

782

**Table 2. The average importance criteria based on 5-point Likert Scale**

|    | Criteria for                                             | Average degree of |
|----|----------------------------------------------------------|-------------------|
| 1  | Thickness of soil and sediments                          | 8.5               |
| 2  | Consolidation and strength of soil and sediments         | 8                 |
| 3  | Type of soil and particle size distribution of sediments | 7.5               |
| 4  | Depth of groundwater                                     | 7.25              |
| 5  | Type of surficial rock                                   | 7                 |
| 6  | Topography of surface                                    | 5.25              |
| 7  | Slop surface                                             | 5                 |
| 8  | Type of bedrock                                          | 5                 |
| 9  | Thickness of bedrock                                     | 4.5               |
| 10 | Morphology of bedrock                                    | 4.5               |
| 11 | Topography of bedrock                                    | 4.5               |
| 12 | Age of alluvial and sediments                            | 3.75              |
| 13 | Age of bedrock                                           | 3.25              |
| 14 | Age of surficial rock                                    | 2.75              |

783

784

785

786

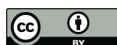

787 Table 3. The results of pair-wise comparisons of the selected criteria with each other based on  
 788 the AHP matrix

| Criteria                                                    | 1 | 2 | 3 | 4 | 5 | 6 | 7   | 8   | Weights |
|-------------------------------------------------------------|---|---|---|---|---|---|-----|-----|---------|
| 1-Thickness of soil and sediments                           | 1 | 1 | 2 | 2 | 5 | 5 | 7   | 4   | 0.271   |
| 2-Consolidation and strength of soil and sediments          |   | 1 | 1 | 1 | 5 | 4 | 5   | 5   | 0.207   |
| 3-Type of soil, and particle size distribution of sediments |   |   | 1 | 1 | 5 | 5 | 5   | 7   | 0.177   |
| 4-Depth of groundwater                                      |   |   |   | 1 | 5 | 7 | 3   | 5   | 0.171   |
| 5-Type of surficial rock                                    |   |   |   |   | 1 | 2 | 1/2 | 1/2 | 0.041   |
| 6-Topography of surface                                     |   |   |   |   |   | 1 | 1/2 | 3   | 0.054   |
| 7-Slop surface                                              |   |   |   |   |   |   | 1   | 4   | 0.040   |
| 8-Type of bedrock                                           |   |   |   |   |   |   |     | 1   | 0.040   |
| Lambda = 8.60 CI = 0.05                                     |   |   |   |   |   |   |     |     |         |

789  
 790  
 791  
 792  
 793

Table 4. Coparesion between the model's output with the measured predominant frequency in Bam city by Askari et al. (2004) (a) and LashkariPour et al. (2006) (b).

a)

| Predicted    | Predominant Frequency ( Measured) |          |          |          |           |  | Total     |
|--------------|-----------------------------------|----------|----------|----------|-----------|--|-----------|
|              | 1                                 | 2        | 3        | 4        | 5         |  |           |
| 1            |                                   |          | 1        |          |           |  | 1         |
| 2            |                                   | 2        |          |          |           |  | 2         |
| 3            |                                   | 1        | 1        | 1        | 1         |  | 4         |
| 4            |                                   |          |          | 7        |           |  | 7         |
| 5            |                                   |          |          |          | 9         |  | 9         |
| <b>Total</b> | <b>1</b>                          | <b>2</b> | <b>2</b> | <b>8</b> | <b>10</b> |  | <b>23</b> |
| Av_Ac = 82 % |                                   |          |          |          |           |  |           |

794  
 795

b)

| Predicted | Predominant Frequency ( Measured) |   |   |   |   | Total |
|-----------|-----------------------------------|---|---|---|---|-------|
|           | 1                                 | 2 | 3 | 4 | 5 |       |
| 1         | 1                                 |   |   |   |   | 1     |
| 2         |                                   | 1 |   |   |   | 1     |
| 3         |                                   |   | 3 |   |   | 3     |



|                     |          |          |          |          |          |           |
|---------------------|----------|----------|----------|----------|----------|-----------|
| 4                   |          |          |          | 1        |          | 1         |
| 5                   | 1        |          |          | 1        | 2        | 4         |
| <b>Total</b>        | <b>2</b> | <b>1</b> | <b>3</b> | <b>2</b> | <b>2</b> | <b>10</b> |
| <b>Av_Ac = 80 %</b> |          |          |          |          |          |           |

796  
 797  
 798

Table 5. Kappa coefficient and OA

| Comparison of the model's output and measured data | Predominant frequency (Askari et al., 2004) | Predominant frequency (LashkariPour et al., 2006) |
|----------------------------------------------------|---------------------------------------------|---------------------------------------------------|
| Kappa coefficient                                  | 0.74 (0.000)                                | 0.75 (0.000)                                      |
| OA                                                 | 82%                                         | 80%                                               |

799  
 800  
 801  
 802  
 803  
 804  
 805  
 806  
 807  
 808  
 809  
 810  
 811  
 812  
 813  
 814  
 815

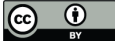

816  
 817

**Figures**

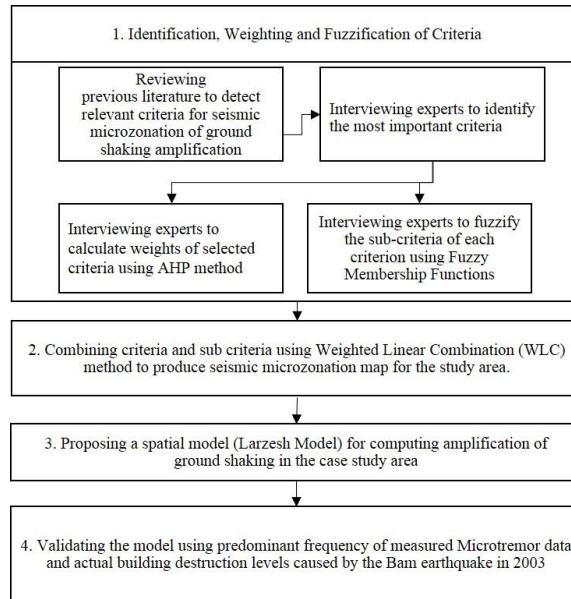

818  
 819  
 820  
 821

**Figure 1. The methodological approach of the model**

822

$$A = \begin{bmatrix} a_{11} & a_{12} & \dots & a_{1n} \\ a_{21} & a_{22} & \dots & a_{2n} \\ \vdots & \vdots & \ddots & \vdots \\ a_{n1} & a_{n2} & \dots & a_{nn} \end{bmatrix}$$

823

Where:  $a_{ij} = 1$ , if  $i = j$ , and  $a_{ij} = \frac{1}{a_{ji}}$ , if  $i = \overline{1, n}$  and  $j = \overline{1, n}$ .

824

Figure 2.AHP matrix (A)

825

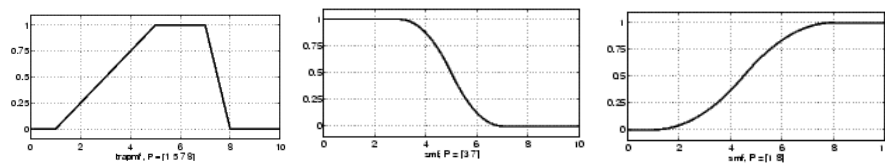

826

827

828

829

Figure 3. Fuzzy membership functions (After Mancini, 2012)

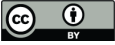

830

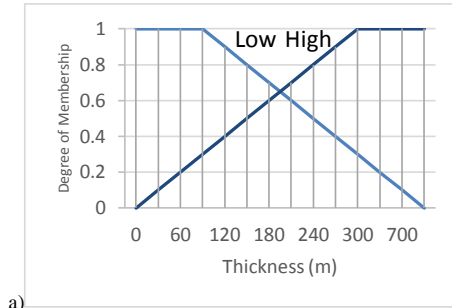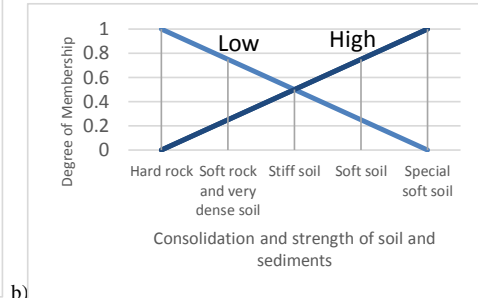

831

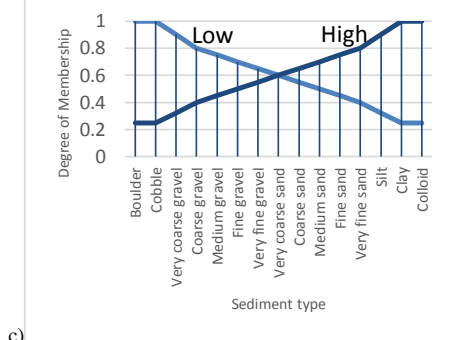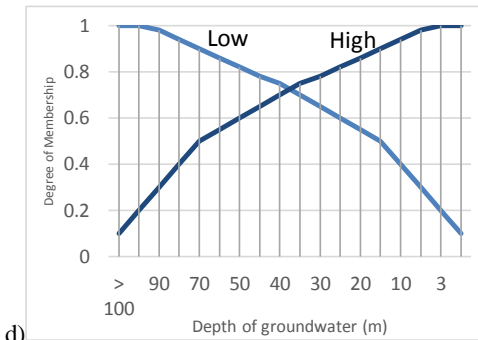

832

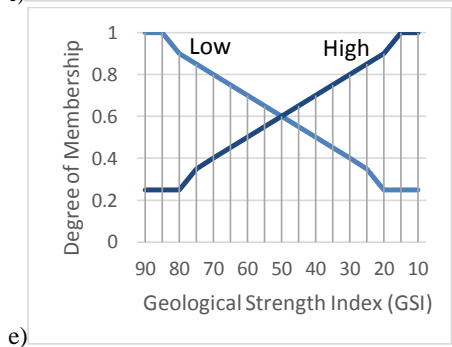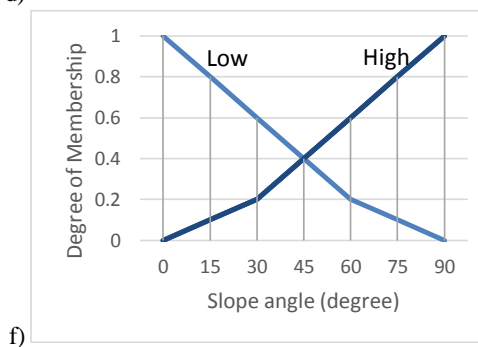

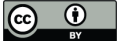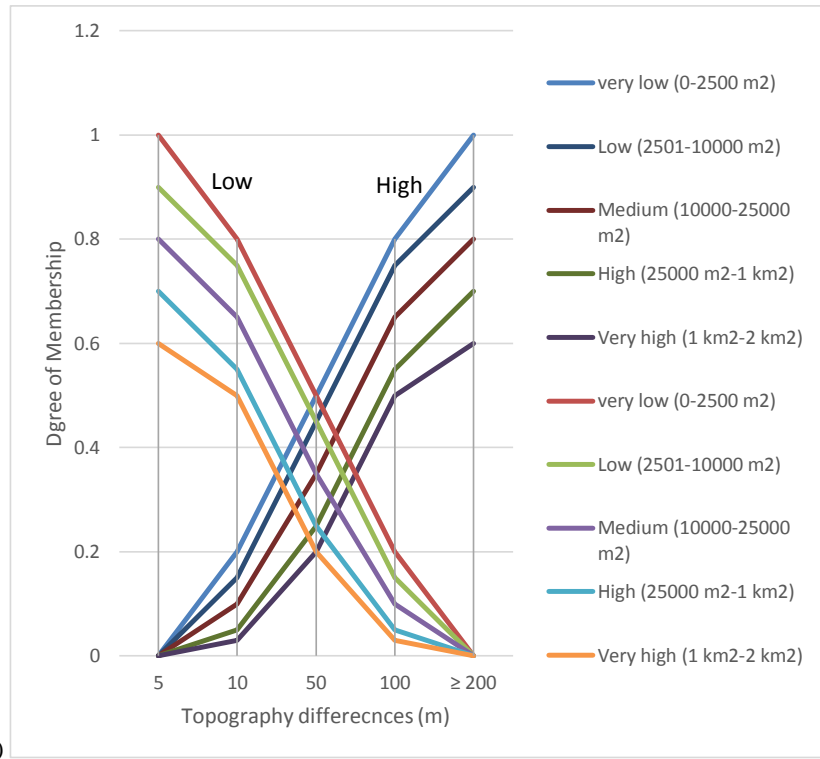

833

834

835

836

837

g) **Figure 4. Membership functions (MFs) based on fuzzy logic system: Thickness of soil and sediments (a), Consolidation and strength of soil and sediments (b), Type of soil and particle size distribution of sediments (c), Depth of groundwater (d), Type of surficial rock and bedrock (e), Slope surface (degree) (f), Topography irregularities (g).**

838

839

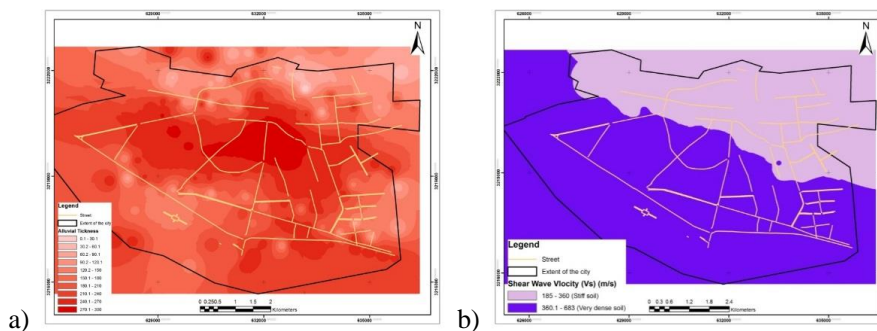



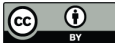

840

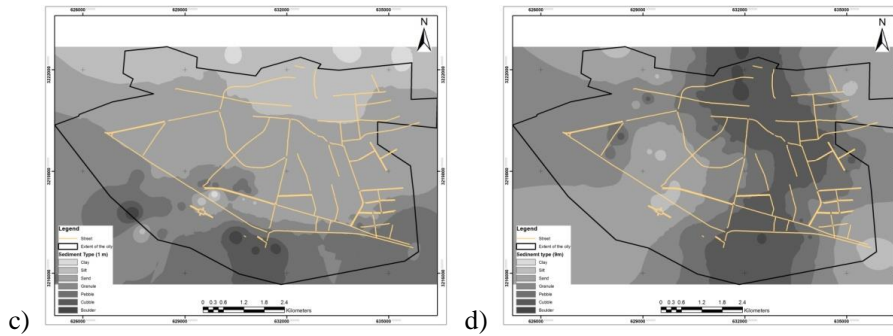

841

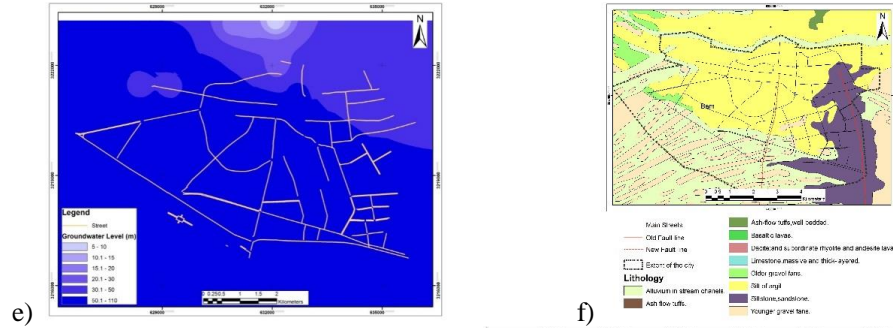

842

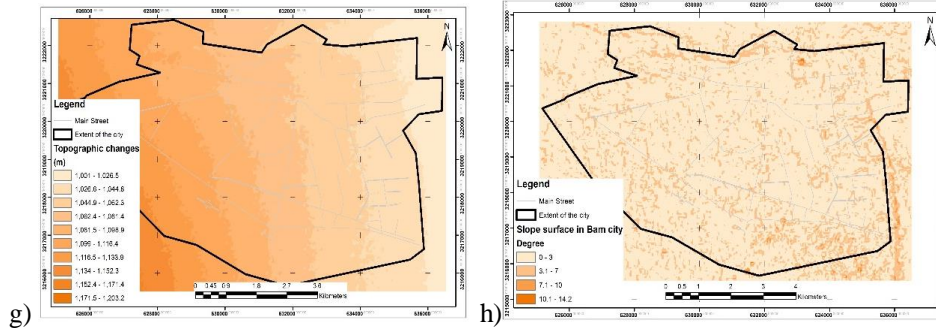

847

**Figure 5. Thematic Layers of Bam city: Thickness of soil and sediments (m) (a), Consolidation and strength of soil and sediments, (b), Sediment type at depth of 1 meter (c) and at depth of 9 meters (d), Groundwater level (e), Type of surficial rock(f), Topography (g) and Slop (h) layers.**



848

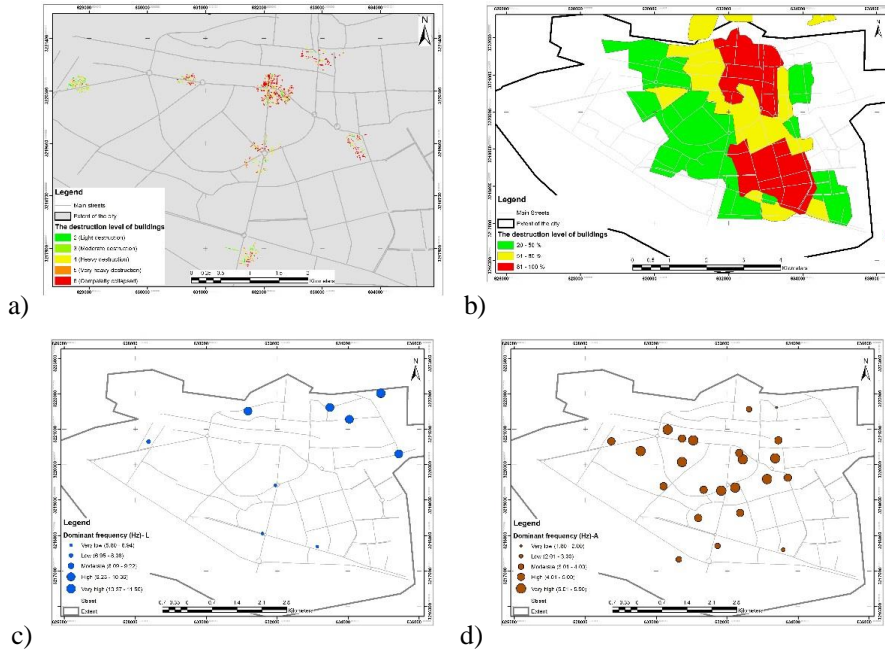

849  
 850  
 851  
 852  
 853  
 854  
 855  
 856

Figure 6. Control data: Actual building destruction level (Hisada et al., 2005) (a), percentage of damage to buildings caused by the Bam earthquake in 2003 (National Cartographic Center (NCC), 2003) (b), Dominant frequency by (LashkariPour et al., 2006) (c) and by (Askari et al., 2004) (d) using Microtremor field measurement.

857  
 858

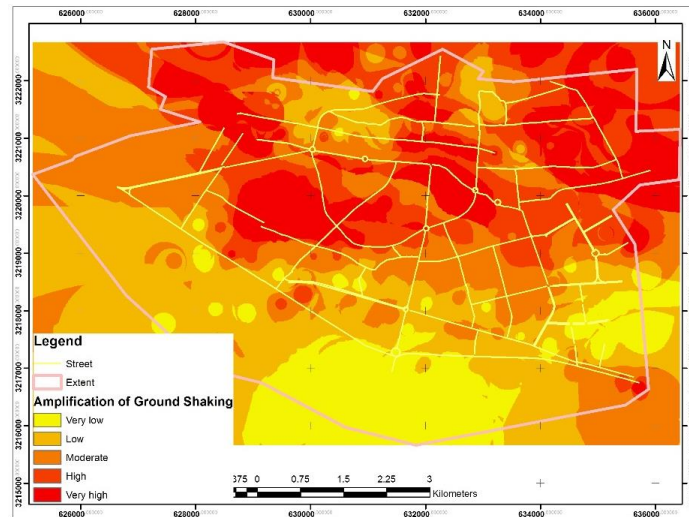

Figure 7. Seismic microzonation of ground shaking map of Bam city
